# Supplementary material for: Improvement in Plasma Drug Activity during the Early Treatment Interval among Tanzanian Patients with Multidrug-Resistant Tuberculosis
Source: PubMed Central journal article supplement (PMC4376785; doi:10.1371/journal.pone.0122769), 2015-03-27
Supplement: pone.0122769.s001.pdf [file pone.0122769.s001.pdf]

**S1 Table. Parameter estimates of the interim treatment outcome in the exact logistic regression model**

| <b>Variable</b>                                  | <b>Alpha<br/>(±standard<br/>error)</b> | <b>Beta<br/>(±standard<br/>error)</b> |
|--------------------------------------------------|----------------------------------------|---------------------------------------|
| Age, years                                       |                                        |                                       |
| <30                                              | referent                               |                                       |
| 30-49                                            | 0.51±0.58                              | 0.51±0.58                             |
| ≥50                                              | 0.55±0.76                              | 0.55±0.76                             |
| Gender, male                                     | 1.79±1.08                              | -1.28±1.20                            |
| Baseline Body Mass Index, mean % ±SD             | 1.37±3.09                              | -0.03±0.16                            |
| HIV infected, yes                                | 0.36±0.49                              | 12.07±203.40                          |
| Smoking                                          | 1.47±0.64                              | -1.75±1.00                            |
| Alcohol                                          | 1.20±0.66                              | -0.80±0.92                            |
| Prior TB treatment episodes                      |                                        |                                       |
| None                                             | referent                               | -5.58±93.75                           |
| One                                              | 5.99±93.75                             | -5.90±148.50                          |
| Two or more                                      | 6.59±148.50                            |                                       |
| Pretreatment MGIT TTP*                           | 0.60±0.96                              | 0.001±0.003                           |
| Proportion with pretreatment MGIT TTP <216 hours | 0.56±0.63                              | 0.54±0.92                             |
| Pretreatment to week 4 change in MGIT TTP*       | 0.21±0.80                              | 0.001±0.001                           |
| Week 2 TDA                                       | -0.66±1.59                             | 0.73±0.77                             |
| Proportion with week 2 TDA > 2log killing, (%N)  | 0.56±0.63                              | 0.54±0.92                             |

|                                                       |             |            |
|-------------------------------------------------------|-------------|------------|
| Week 4 TDA mean                                       | -3.84±2.46  | 2.14±1.16  |
| Proportion with week 4 TDA > 2log killing, (%N)       | -0.51±0.73  | 2.38±1.05  |
| Proportion with increase in TDA from week 2 to week 4 | -1.39 ±1.12 | 3.00 ±1.28 |
