# Supplementary material for: Improvement in Plasma Drug Activity during the Early Treatment Interval among Tanzanian Patients with Multidrug-Resistant Tuberculosis
Source: PubMed Central journal article supplement (PMC4376785; doi:10.1371/journal.pone.0122769), 2015-03-27
Supplement: pone.0122769.s002.pdf [file pone.0122769.s002.pdf]

**S2 Table. Predicted probabilities of favorable treatment outcome**

| <b>TDA increase from Week 2 to week 4</b> | <b>Pretreatment TTP &lt; 216 hours</b> | <b>Predicted probabilities of favorable outcome</b> |
|-------------------------------------------|----------------------------------------|-----------------------------------------------------|
|                                           |                                        |                                                     |
| <b>Yes</b>                                | <b>Yes</b>                             | <b>0.8217</b>                                       |
| No                                        | Yes                                    | 0.2550                                              |
| No                                        | No                                     | 0.2031                                              |
| <b>Yes</b>                                | <b>No</b>                              | <b>0.7743</b>                                       |

Note: Supplemental Table 2 demonstrates that TDA increase from Week 2 to week 4 corresponded to high predicted probabilities of the favorable outcome.
